# Supplementary material
Source: MDPI journal article supplement (https://www.mdpi.com/2073-4395/10/10/1595)
Supplement: s1 [file s1]

# Supplementary Materials:

**Table S1.** Precipitation and temperature reported during the growing season of 2017 when the field experiment was conducted. The data are compared with the long-term records conducted in the years 1961-1990. The data were recorded at the experimental station of the Department of Agroecology and Plant Production, University of Agriculture in Krakow, Poland.

| Years              | Decades     | Months |       |      |      |      | III-VII | I-XII  |
|--------------------|-------------|--------|-------|------|------|------|---------|--------|
|                    |             | III    | IV    | V    | VI   | VII  |         |        |
| Precipitation [mm] |             |        |       |      |      |      |         |        |
| 2017               | 1           | 12.2   | 12.0  | 20.8 | 15.0 | 17.3 | 77.3    | 264.1  |
|                    | 2           | 13.7   | 45.0  | 6.9  | 5.6  | 15.2 | 86.4    | 428.0  |
|                    | 3           | 13.2   | 49.8  | 31.0 | 9.4  | 52.6 | 156     | 325.9  |
|                    | Sum:        | 39.1   | 106.7 | 58.7 | 30.0 | 85.1 | 319.6   | 1018.0 |
| 1961-1990          |             | 34.0   | 48.0  | 83.0 | 97.0 | 85.0 | 347     | 681.0  |
| Temperature [°C]   |             |        |       |      |      |      |         |        |
| 2017               | 1           | 5.8    | 10.6  | 9.9  | 17.6 | 18.1 | 12.4    | 7.5    |
|                    | 2           | 4.9    | 5.7   | 14.6 | 17.5 | 19.1 | 12.3    | 7.5    |
|                    | 3           | 7.7    | 5.5   | 16.5 | 19.4 | 20.1 | 14.4    | 8.0    |
|                    | Mean value: | 6.2    | 7.3   | 13.7 | 18.2 | 19.1 | 12.9    | 7.7    |
| 1961-1990          |             | 2.4    | 7.9   | 13.1 | 16.2 | 17.5 | 11.42   | 7.7    |
